# Supplementary material
Source: Research Square preprint supplement (doi:10.21203/rs.3.rs-10002809/v1)
Supplement: Supplementary file 1 [file 0bcde392518cf69b811a2912.docx]

**COREQ**

| No. | Question | Reported Content |
| --- | --- | --- |
| 1 | Which author/s conducted the interview or focus group? | All interviews were conducted by the first author (Haotian Wu). |
| 2 | What were the researcher's credentials? | Master's degree. |
| 3 | What was their occupation at the time of the study? | University teacher. |
| 4 | Was the researcher male or female? | Male. |
| 5 | What experience or training did the researcher have? | Five years of experience in medical humanities and sports education. |
| 6 | Was a relationship established prior to study commencement? | The interviewer had no prior relationship with any of the participants before the study commenced. Prior to interviews, participants were informed that the study was unrelated to academic evaluation or team assessment. Neutrality was maintained during interviews. |
| 7 | What did the participants know about the researcher? | Participants were informed of the study purpose and the interviewer's identity (first author) but were not provided with specific research hypotheses prior to the interviews. |
| 8 | What characteristics were reported about the interviewer/facilitator? | The interviewer holds a background in medical humanities and sports education, which may predispose an interest in the positive effects of exercise. To mitigate potential bias, the interviewer maintained a neutral stance during interviews, refrained from leading questions, and kept a reflective journal. |
| 9 | What methodological orientation was stated to underpin the study? | Grounded theory (section "Method selection"). |
| 10 | How were participants selected? | Purposive sampling (section "Participants"). |
| 11 | How were participants approached? | Through coach referrals from university sports teams or campus announcements. |
| 12 | How many participants were in the study? | 22 participants (section "Participants" and Table 1). |
| 13 | How many people refused to participate or dropped out? Reasons? | Of the 28 eligible postgraduates contacted, 22 agreed to participate (response rate 78.6%). Six declined due to time constraints (n=4) or lack of interest (n=2). No participants dropped out after enrolment. |
| 14 | Where was the data collected? | In a meeting room at the researcher's university (section "Participants"). |
| 15 | Was anyone else present besides the participants and researchers? | All interviews were conducted in a private meeting room with only the participant and the interviewer present. No non-participants (e.g., family members, colleagues, or interpreters) were present. |
| 16 | What are the important characteristics of the sample? | Gender, grade, sport type, and purpose of participation (Table 1). |
| 17 | Was an interview guide provided? Was it pilot tested? | The interview guide was developed through team discussion and expert refinement, then pilot-tested with two clinical medicine postgraduates who met the inclusion criteria but were not included in the final sample. Minor wording adjustments were made based on their feedback. |
| 18 | Were repeat interviews carried out? If yes, how many? | Follow-up interviews were conducted with five participants (A02, A05, A10, A15, A19). Each participant received one follow-up interview. |
| 19 | Did the research use audio or visual recording? | All interviews were audio-recorded and transcribed verbatim. |
| 20 | Were field notes made? | Field notes were taken immediately after each interview to record non-verbal cues, contextual observations, and preliminary reflections. |
| 21 | What was the duration of the interviews? | 40–50 minutes (section "Data collection"). |
| 22 | Was data saturation discussed? | Theoretical saturation was tested and achieved (section "Theoretical saturation testing"). |
| 23 | Were transcripts returned to participants? | Yes, transcripts were returned to participants for comment. |
| 24 | How many data coders coded the data? | Three coders: the first author (Haotian Wu) and second author (Qian Zhang) coded independently; discrepancies were adjudicated by the third author (Jing Zhuang). |
| 25 | Was a description of the coding tree provided? | Yes (Tables 2, 3, and section "Qualitative data analysis"). |
| 26 | Were themes identified in advance or derived from the data? | Derived from the data (section "Qualitative data analysis"). |
| 27 | What software was used to manage the data? | NVivo (section "Qualitative data analysis"). |
| 28 | Did participants provide feedback on the findings? | Yes. A summary of preliminary findings was shared with five participants (A02, A07, A12, A18, A21), who confirmed the accuracy and resonance of the interpretations. |
| 29 | Were participant quotations presented? Was each quotation identified? | Yes, with participant numbers (e.g., A11) (section "Results"). |
| 30 | Was there consistency between the data presented and the findings? | Yes, as reflected in the discussion and the theoretical model. |
| 31 | Were major themes clearly presented? | Yes (section "Results" and Figure 2). |
| 32 | Was there a description of diverse cases or discussion of minor themes? | Yes, as shown in the coding tables and illustrative quotations. |
